# Supplementary material
Source: PubMed Central journal article supplement (PMC5008243)
Supplement: NIHMS770792-supplement-1.pdf [file NIHMS770792-supplement-1.pdf]

# Supplemental figure 1

A

MKRRKTLSAIIMTLFLIINIVMISCGSGGPAPKEGQAAKADGTVVDLVKVSKKIKDAVEFAANVKEEVETLVKSINELAKAI  
GKKIKSDGQFDTESDKNGSLLAGAQSIMLAVKAKLGLDNKEGISTELKQKVTDSKTKTETFLTKLKDNHSDLGKNEAT  
DAHAKSAIDITDTGTDKDKGTSELIALNTSINALLETANDEVEAAIKALINPSKALTAGQSS

B

MKRRKTLSAIIMTLFLGLVSCNSSGTVAEESPQSRFLKSVISLGNDFLNVFTSFGDMVGGVLGFNINTKKSVDVGLYFKKVQ  
DTVQGTGDKLEKIVADMKTEGNPNASGVETAVKKLVSSETLNKIIIEGAKTASEAIGTDNNPIGNVAATNAAGAAGTGVD  
SLVKGIKGIVEVVLKEGNAEAGNDKKAEDGNTARTAAAGDGEAGKLTSGAGAAGDANNSKVAADAACAVGAVTG  
ADILKAIKDGGDAAKLATSQNAGAAPKDATIAGGIALRVMAKDGGKFAGPSAAADDAVTAVKGVAVSAVTKKALDTLTI  
AIRNTIDLGLKEVKEAMKINNAINASDTP

## Supplemental figure 1. Mass-spectrometric peptide hit coverage

Mass spectrometry peptides covering (A) *B. miyamotoi* LB-2001 Vsp1 and (B) the partial VlpC2 amino acid sequences. Amino acid sequences that match peptides are bold and underscored.
